# Supplementary material
Source: MDPI journal article supplement (https://www.mdpi.com/2079-6412/9/2/70)
Supplement: s1 [file s1]

## Supplementary Materials

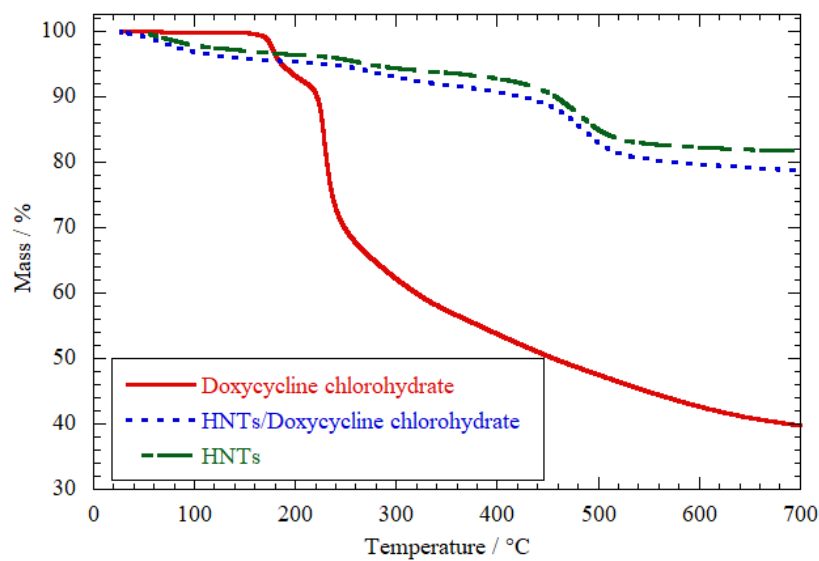

**Figure S1.** Thermogravimetric curves for HNTs loaded with Doxycycline chlorohydrate and their pure components (HNTs and Doxycycline chlorohydrate).
